# Supplementary material
Source: PubMed Central journal article supplement (PMC4776758)
Supplement: NIHMS762897-supplement-Supporting_Informaiton.pdf [file NIHMS762897-supplement-Supporting_Informaiton.pdf]

**Supporting Information for:**

**An Orthogonal Injection Ion Funnel Interface Providing Enhanced Performance for Selected Reaction Monitoring-Triple Quadrupole Mass Spectrometry**

Tsung-Chi Chen, Thomas L. Fillmore, Spencer A. Prost, Ronald J. Moore, Yehia M. Ibrahim and Richard D. Smith

## **Abstract**

The supporting information includes two figures to help illuminate certain points in the text. The first figure (S1) depicts the ion current measurement at HPIF converging section in orthogonal and inline injection mode for the comparison to Figure 2c. The supplemental Table 1-4 shows the details of the experimental conditions and the quantitative MS analysis of low abundance peptides.

**Supplemental Figure S1** Measurement of ion transmission efficiency at HPIF converging section in orthogonal and inline injection mode.

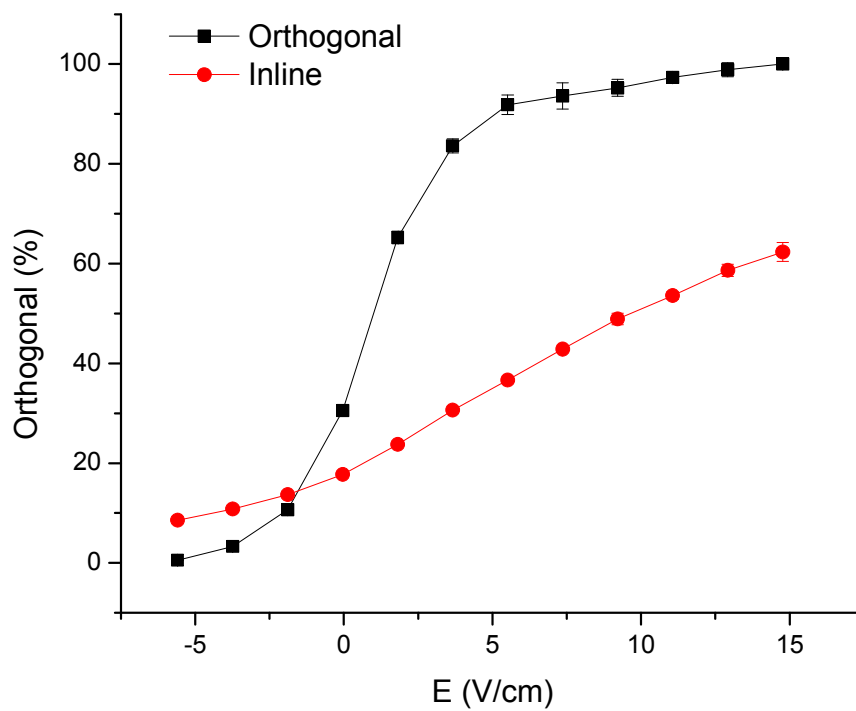

**Supplemental Table S1.** 9 peptide mixture used for performance evaluation

| <b>Peptide number</b> | <b>Peptide</b>      | <b>Monitored mass (m/z)</b> | <b>charge</b> |
|-----------------------|---------------------|-----------------------------|---------------|
| 1                     | Bradykinin          | 530.7988                    | 2             |
| 2                     | Human Angiotensin I | 432.8998                    | 3             |
| 3                     | Human Neurotensin   | 558.3105                    | 3             |
| 4                     | Fibrinopeptide A    | 768.8499                    | 2             |
| 5                     | Substance P         | 674.8634                    | 2             |
| 6                     | Kemptide            | 386.743                     | 2             |
| 7                     | Angiotensin II      | 523.7745                    | 2             |
| 8                     | Melittin            | 712.4418                    | 4             |
| 9                     | Renin               | 586.9824                    | 3             |

**Supplemental Table S2. MS<sup>1</sup> Quantitative measurements using the 9 peptide mixture**

| Interface  | Peptide Number <sup>a</sup> | Concentration (nmol) |         |         |         |         |         |         |         |         |         |         |         |
|------------|-----------------------------|----------------------|---------|---------|---------|---------|---------|---------|---------|---------|---------|---------|---------|
|            |                             | 0.39                 | 0.78    | 1.56    | 3.13    | 6.25    | 12.5    | 25      | 50      | 100     | 200     | 400     |         |
| Orthogonal | 1                           | Intensity            | 1.1E+06 | 1.3E+06 | 1.7E+06 | 2.5E+06 | 4.4E+06 | 7.4E+06 | 1.4E+07 | 2.7E+07 | 5.6E+07 | 9.8E+07 |         |
|            |                             | CV(%)                |         | 6.70%   | 3.20%   | 2.95%   | 1.95%   | 4.24%   | 1.95%   | 3.26%   | 0.68%   | 1.25%   | 1.09%   |
|            |                             | S/N <sup>b</sup>     | <3      | 6.9     | 9.3     | 13.2    | 18.2    | 29.6    | 52.1    | 87.2    | 81.0    | 126.1   | 222.3   |
|            | 2                           | Intensity            |         |         | 2.0E+06 | 3.1E+06 | 5.4E+06 | 1.1E+07 | 1.9E+07 | 4.1E+07 | 7.0E+07 | 1.9E+08 | 3.0E+08 |
|            |                             | CV(%)                |         |         | 3.63%   | 3.56%   | 1.27%   | 11.93%  | 4.17%   | 1.33%   | 3.67%   | 3.20%   | 0.98%   |
|            |                             | S/N                  |         | <3      | 6.8     | 14.0    | 33.8    | 64.6    | 71.2    | 115.4   | 204.3   | 328.5   | 230.2   |
|            | 3                           | Intensity            |         | 7.6E+05 | 1.1E+06 | 1.6E+06 | 2.6E+06 | 5.5E+06 | 9.1E+06 | 1.7E+07 | 3.0E+07 | 7.2E+07 | 1.4E+08 |
|            |                             | CV(%)                |         | 1.28%   | 3.70%   | 1.00%   | 2.16%   | 7.81%   | 2.33%   | 2.27%   | 4.77%   | 3.29%   | 2.02%   |
|            |                             | S/N                  | <3      | 5.0     | 11.0    | 17.8    | 33.5    | 79.7    | 112.9   | 124.3   | 118.9   | 119.2   | 88.5    |
|            | 4                           | Intensity            |         | 3.6E+05 | 4.9E+05 | 8.0E+05 | 1.4E+06 | 2.6E+06 | 4.9E+06 | 8.5E+06 | 2.5E+07 | 4.4E+07 |         |
|            |                             | CV(%)                |         | 4.12%   | 5.52%   | 0.71%   | 16.94%  | 1.71%   | 2.70%   | 3.37%   | 2.69%   | 3.08%   |         |
|            |                             | S/N                  |         | <3      | 4.9     | 8.3     | 22.6    | 28.6    | 42.5    | 88.2    | 104.6   | 311.2   | 300.4   |
|            | 5                           | Intensity            |         | 5.4E+05 | 5.6E+05 | 7.7E+05 | 1.1E+06 | 1.9E+06 | 3.3E+06 | 6.1E+06 | 1.2E+07 | 2.6E+07 | 4.5E+07 |
|            |                             | CV(%)                |         | 6.07%   | 4.16%   | 3.83%   | 5.41%   | 4.08%   | 3.40%   | 2.32%   | 4.56%   | 0.84%   | 1.65%   |
|            |                             | S/N                  |         | 6.1     | 6.2     | 11.0    | 12.6    | 24.9    | 29.3    | 44.5    | 83.8    | 64.0    | 60.2    |
|            | 6                           | Intensity            |         |         |         | 2.8E+06 | 4.1E+06 | 7.8E+06 | 1.3E+07 | 2.5E+07 | 4.3E+07 | 1.0E+08 | 2.0E+08 |
|            |                             | CV(%)                |         |         |         | 4.68%   | 0.95%   | 10.65%  | 4.13%   | 1.61%   | 3.65%   | 1.62%   | 2.23%   |
|            |                             | S/N                  |         |         | <3      | 8.8     | 16.7    | 36.5    | 56.8    | 95.1    | 193.0   | 345.6   | 272.2   |
| 7          | Intensity                   |                      | 1.1E+06 | 1.4E+06 | 1.7E+06 | 2.5E+06 | 4.5E+06 | 7.2E+06 | 1.4E+07 | 2.4E+07 | 5.3E+07 | 9.2E+07 |         |
|            | CV(%)                       |                      | 9.07%   | 2.77%   | 4.14%   | 0.69%   | 16.79%  | 1.83%   | 1.63%   | 2.37%   | 1.65%   | 1.57%   |         |
|            | S/N                         | <3                   | 8.6     | 11.6    | 14.5    | 30.1    | 68.5    | 98.1    | 163.6   | 258.7   | 374.8   | 490.7   |         |
| 8          | Intensity                   |                      |         |         |         | 1.0E+06 | 1.6E+06 | 3.0E+06 | 5.0E+06 | 9.0E+06 | 1.9E+07 | 3.1E+07 |         |
|            | CV(%)                       |                      |         |         |         | 6.52%   | 13.99%  | 5.48%   | 3.81%   | 5.44%   | 1.57%   | 1.37%   |         |
|            | S/N                         |                      |         |         | <3      | 20.2    | 22.0    | 38.0    | 42.9    | 62.5    | 114.1   | 146.1   |         |
| 9          | Intensity                   |                      |         |         | 8.5E+05 | 1.3E+06 | 2.4E+06 | 4.1E+06 | 8.0E+06 | 1.4E+07 | 3.3E+07 | 6.3E+07 |         |
|            | CV(%)                       |                      |         |         | 0.14%   | 7.05%   | 13.27%  | 3.82%   | 2.93%   | 1.11%   | 1.44%   | 0.78%   |         |
|            | S/N                         |                      |         | <3      | 9.1     | 14.6    | 19.2    | 32.3    | 51.7    | 72.2    | 113.3   | 117.4   |         |
| Inline     | 1                           | Intensity            | 1.2E+06 | 1.2E+06 | 1.6E+06 | 1.9E+06 | 3.1E+06 | 5.8E+06 | 1.1E+07 | 1.9E+07 | 3.8E+07 | 8.3E+07 |         |
|            |                             | CV(%)                | 0.88%   | 9.03%   | 1.31%   | 2.11%   | 3.05%   | 1.63%   | 5.25%   | 3.01%   | 1.47%   | 4.13%   |         |
|            |                             | S/N <sup>b</sup>     | <3      | 5.9     | 7.7     | 9.4     | 14.6    | 39.4    | 42.8    | 80.1    | 129.8   | 141.8   | 268.9   |
|            | 2                           | Intensity            |         |         |         | 2.5E+06 | 3.7E+06 | 6.2E+06 | 1.1E+07 | 2.3E+07 | 4.5E+07 | 9.1E+07 | 2.1E+08 |
|            |                             | CV(%)                |         |         |         | 2.19%   | 4.49%   | 2.69%   | 6.06%   | 4.99%   | 6.42%   | 2.55%   | 2.83%   |
|            |                             | S/N                  |         |         | <3      | 3.7     | 14.4    | 21.2    | 32.7    | 66.8    | 123.3   | 217.1   | 277.2   |
|            | 3                           | Intensity            |         | 1.1E+06 | 1.4E+06 | 1.8E+06 | 2.9E+06 | 5.3E+06 | 1.0E+07 | 1.9E+07 | 3.7E+07 | 8.9E+07 |         |
|            |                             | CV(%)                |         | 9.25%   | 0.95%   | 5.72%   | 0.82%   | 3.95%   | 4.48%   | 2.04%   | 3.91%   | 3.01%   |         |
|            |                             | S/N                  |         | <3      | 7.8     | 7.5     | 21.8    | 36.6    | 61.5    | 118.2   | 153.6   | 139.1   | 109.7   |
|            | 4                           | Intensity            |         | 4.1E+05 | 5.6E+05 | 6.1E+05 | 8.6E+05 | 1.5E+06 | 2.8E+06 | 5.3E+06 | 1.2E+07 | 2.6E+07 |         |
|            |                             | CV(%)                |         | 14.68%  | 5.43%   | 11.15%  | 1.36%   | 4.26%   | 2.75%   | 6.13%   | 1.97%   | 2.37%   |         |
|            |                             | S/N                  |         | <3      | 7.5     | 4.3     | 11.4    | 22.4    | 28.1    | 47.9    | 83.5    | 157.1   | 235.5   |
|            | 5                           | Intensity            |         |         |         |         | 8.7E+05 | 1.3E+06 | 2.5E+06 | 4.0E+06 | 7.3E+06 | 1.5E+07 | 3.3E+07 |
|            |                             | CV(%)                |         |         |         |         | 6.26%   | 2.14%   | 2.17%   | 3.73%   | 4.41%   | 2.14%   | 2.31%   |
|            |                             | S/N                  |         |         |         | <3      | 7.4     | 16.7    | 22.6    | 33.0    | 38.7    | 54.6    | 31.8    |
|            | 6                           | Intensity            |         |         |         | 3.8E+06 | 5.4E+06 | 9.7E+06 | 1.7E+07 | 3.1E+07 | 6.1E+07 | 1.4E+08 |         |
|            |                             | CV(%)                |         |         |         | 2.97%   | 1.85%   | 4.89%   | 2.42%   | 6.93%   | 2.17%   | 2.17%   |         |
|            |                             | S/N                  |         |         |         | <3      | 11.4    | 21.9    | 29.3    | 60.2    | 94.5    | 209.7   | 555.0   |
| 7          | Intensity                   |                      |         |         | 1.3E+06 | 1.6E+06 | 2.4E+06 | 4.4E+06 | 8.3E+06 | 1.6E+07 | 3.1E+07 | 6.8E+07 |         |
|            | CV(%)                       |                      |         |         | 2.19%   | 1.65%   | 1.79%   | 3.60%   | 3.42%   | 1.53%   | 1.95%   | 4.07%   |         |
|            | S/N                         |                      |         | <3      | 5.4     | 18.4    | 28.5    | 40.9    | 65.5    | 119.0   | 243.3   | 400.9   |         |
| 8          | Intensity                   |                      |         |         | 6.7E+05 | 7.9E+05 | 9.7E+05 | 2.1E+06 | 3.1E+06 | 6.4E+06 | 1.7E+07 |         |         |
|            | CV(%)                       |                      |         |         | 9.30%   | 3.95%   | 7.97%   | 8.80%   | 4.16%   | 4.53%   | 4.30%   |         |         |
|            | S/N                         |                      |         |         | <3      | 9.0     | 10.7    | 12.1    | 31.0    | 40.3    | 83.3    | 158.9   |         |
| 9          | Intensity                   |                      |         |         | 1.0E+06 | 1.4E+06 | 2.5E+06 | 5.0E+06 | 9.2E+06 | 1.8E+07 | 4.1E+07 |         |         |
|            | CV(%)                       |                      |         |         | 5.37%   | 1.58%   | 7.54%   | 2.30%   | 7.24%   | 4.57%   | 3.19%   |         |         |
|            | S/N                         |                      |         |         | <3      | 8.7     | 14.7    | 17.5    | 29.2    | 34.5    | 47.7    | 51.0    |         |
| Standard   | 1                           | Intensity            |         |         |         |         | 9.2E+06 | 1.4E+07 | 2.2E+07 | 3.2E+07 | 5.5E+07 | 1.0E+08 |         |
|            |                             | CV(%)                |         |         |         |         | 17.67%  | 3.22%   | 6.02%   | 2.43%   | 5.03%   | 1.38%   |         |
|            |                             | S/N <sup>b</sup>     |         |         |         |         | >20%    | <3      | 13.2    | 18.2    | 29.6    | 52.1    | 87.2    |
|            | 2                           | Intensity            |         |         |         |         |         | 1.1E+07 | 1.9E+07 | 3.2E+07 | 5.0E+07 | 9.2E+07 | 1.9E+08 |
|            |                             | CV(%)                |         |         |         |         |         | >20%    | 18.05%  | 2.74%   | 7.04%   | 3.46%   | 7.44%   |
|            |                             | S/N                  |         |         |         |         |         | <3      | 14.0    | 33.8    | 64.6    | 71.2    | 115.4   |
|            | 3                           | Intensity            |         |         |         |         |         | 1.1E+07 | 1.6E+07 | 2.7E+07 | 4.0E+07 | 6.9E+07 | 1.2E+08 |
|            |                             | CV(%)                |         |         |         |         |         | >20%    | 16.22%  | 1.92%   | 5.36%   | 5.39%   | 12.13%  |
|            |                             | S/N                  |         |         |         |         |         |         | 17.8    | 33.5    | 79.7    | 112.9   | 124.3   |
|            | 4                           | Intensity            |         |         |         |         |         |         | 3.5E+06 | 3.6E+06 | 5.3E+06 | 8.3E+06 |         |
|            |                             | CV(%)                |         |         |         |         |         |         | 10.99%  | 8.88%   | 9.25%   | 8.50%   |         |
|            |                             | S/N                  |         |         |         |         |         |         | 28.6    | 42.5    | 88.2    | 104.6   |         |
|            | 5                           | Intensity            |         |         |         |         |         | 4.3E+06 | 7.9E+06 | 9.3E+06 | 1.2E+07 | 1.8E+07 | 3.5E+07 |
|            |                             | CV(%)                |         |         |         |         |         | >20%    | 19.76%  | 4.47%   | 8.21%   | 7.07%   | 1.11%   |
|            |                             | S/N                  |         |         |         |         |         |         | 11.0    | 12.6    | 24.9    | 29.3    | 44.5    |
|            | 6                           | Intensity            |         |         |         |         |         |         | 3.4E+07 | 4.5E+07 | 6.6E+07 | 1.1E+08 |         |
|            |                             | CV(%)                |         |         |         |         |         |         | 4.11%   | 5.76%   | 4.04%   | 1.91%   |         |
|            |                             | S/N                  |         |         |         |         |         |         | 36.5    | 56.8    | 95.1    | 193.0   |         |
| 7          | Intensity                   |                      |         |         |         |         | 1.4E+07 | 2.0E+07 | 2.6E+07 | 4.5E+07 | 8.4E+07 |         |         |
|            | CV(%)                       |                      |         |         |         |         | >20%    | 4.15%   | 6.53%   | 6.64%   | 1.53%   |         |         |
|            | S/N                         |                      |         |         |         |         |         | 30.1    | 68.5    | 98.1    | 163.6   |         |         |
| 8          | Intensity                   |                      |         |         |         |         |         | 4.2E+06 | 5.5E+06 | 6.3E+06 | 1.1E+07 |         |         |
|            | CV(%)                       |                      |         |         |         |         |         | >20%    | 7.88%   | 13.59%  | 13.85%  |         |         |
|            | S/N                         |                      |         |         |         |         |         | 20.2    | 22.0    | 38.0    | 42.9    |         |         |
| 9          | Intensity                   |                      |         |         |         |         |         | 6.7E+06 | 8.7E+06 | 1.1E+07 | 1.9E+07 |         |         |
|            | CV(%)                       |                      |         |         |         |         |         | >20%    | 8.82%   | 8.56%   | 8.36%   |         |         |
|            | S/N                         |                      |         |         |         |         |         | 14.6    | 19.2    | 32.3    | 51.7    |         |         |

<sup>a</sup> The peptide information according to the peptide number is described in Table 1.

<sup>b</sup> Average S/N for 3 SRM measurements. S/N calculation is described in Methods.

**Supplemental Table S3.** Set of 18 spiked-in surrogate peptides selected from the four proteins mixture.

| Peptide number | Peptide sequence*     | Precursor mass (m/z) | Precursor charge | Product mass (m/z) | Observed Product charge | Fragment | Collision energy |
|----------------|-----------------------|----------------------|------------------|--------------------|-------------------------|----------|------------------|
| 1              | AFKDEDTQAMPFR         | 522.581258           | 3                | 631.325997         | 1                       | y5       | 14               |
|                |                       |                      |                  | 560.288883         | 1                       | y4       | 13               |
|                |                       |                      |                  | 429.248399         | 1                       | y3       | 13               |
|                |                       |                      |                  | 766.408147         | 1                       | y7       | 15               |
| 2              | DFPIANGER             | 514.75539            | 2                | 556.271319         | 1                       | y5       | 20               |
|                |                       |                      |                  | 383.707711         | 2                       | y7       | 14               |
| 3              | DGPLTGTYSR            | 495.24994            | 2                | 607.30737          | 1                       | y5       | 17               |
|                |                       |                      |                  | 506.259692         | 1                       | y4       | 15               |
|                |                       |                      |                  | 409.225737         | 2                       | y7       | 14               |
| 4              | EDLIAYLK              | 486.778225           | 2                | 728.479637         | 1                       | y6       | 15               |
|                |                       |                      |                  | 615.395573         | 1                       | y5       | 15               |
|                |                       |                      |                  | 502.311509         | 1                       | y4       | 13               |
| 5              | GGLEPINFQTAADQAR      | 849.427684           | 2                | 1341.678508        | 1                       | y12      | 25               |
|                |                       |                      |                  | 1131.54168         | 1                       | y10      | 28               |
|                |                       |                      |                  | 671.342892         | 2                       | y12      | 24               |
| 6              | HGFLPR                | 368.710057           | 2                | 599.353926         | 1                       | y5       | 14               |
|                |                       |                      |                  | 542.332463         | 1                       | y4       | 14               |
| 7              | IVGGWECEK             | 543.262416           | 2                | 263.660507         | 2                       | z4       | 20               |
|                |                       |                      |                  | 972.433492         | 1                       | y8       | 18               |
|                |                       |                      |                  | 873.365078         | 1                       | y7       | 17               |
| 8              | LFTGHPETLEK           | 427.230593           | 3                | 724.396695         | 1                       | y6       | 15               |
|                |                       |                      |                  | 583.80022          | 2                       | y10      | 11               |
|                |                       |                      |                  | 510.266013         | 2                       | y9       | 11               |
| 9              | LSEPAELTDAVK          | 640.844824           | 2                | 951.523687         | 1                       | y9       | 18               |
|                |                       |                      |                  | 854.470923         | 1                       | y8       | 23               |
|                |                       |                      |                  | 541.307152         | 1                       | y5       | 15               |
| 10             | LWSAEIPNLYR           | 686.368379           | 2                | 1072.566104        | 1                       | y9       | 19               |
|                |                       |                      |                  | 785.454369         | 1                       | y6       | 23               |
|                |                       |                      |                  | 672.370305         | 1                       | y5       | 19               |
| 11             | TGNLHGLFGR            | 589.818856           | 2                | 696.381538         | 1                       | y6       | 22               |
|                |                       |                      |                  | 559.322626         | 1                       | y5       | 23               |
|                |                       |                      |                  | 510.784285         | 2                       | y9       | 19               |
| 12             | TQDENPVVHFFK          | 490.248535           | 3                | 881.512334         | 1                       | y7       | 18               |
|                |                       |                      |                  | 685.391156         | 1                       | y5       | 15               |
|                |                       |                      |                  | 586.322743         | 1                       | y4       | 19               |
| 13             | VDEDQPFPAVPK          | 675.344991           | 2                | 763.459236         | 1                       | y7       | 17               |
|                |                       |                      |                  | 519.338058         | 1                       | y5       | 20               |
|                |                       |                      |                  | 252.179767         | 1                       | y2       | 18               |
| 14             | VEADIAGHGQEVLR        | 539.625856           | 3                | 824.486397         | 1                       | y7       | 22               |
|                |                       |                      |                  | 759.400938         | 2                       | y14      | 15               |
|                |                       |                      |                  | 694.879642         | 2                       | y13      | 14               |
| 15             | VLAIHDLNEDQLR         | 515.946818           | 3                | 784.382326         | 1                       | y6       | 21               |
|                |                       |                      |                  | 723.882381         | 2                       | y12      | 14               |
|                |                       |                      |                  | 667.340349         | 2                       | y11      | 15               |
| 16             | VLVLDTDYKK            | 601.349545           | 2                | 989.539337         | 1                       | y8       | 19               |
|                |                       |                      |                  | 890.470923         | 1                       | y7       | 20               |
|                |                       |                      |                  | 777.386859         | 1                       | y6       | 20               |
| 17             | VYVEELKPTPEGDLLEILLQK | 774.429186           | 3                | 1030.074269        | 2                       | y18      | 18               |
|                |                       |                      |                  | 980.540063         | 2                       | y17      | 19               |
|                |                       |                      |                  | 794.955437         | 2                       | y14      | 17               |
| 18             | YEINVLK               | 458.759944           | 2                | 624.40669          | 1                       | y5       | 16               |
|                |                       |                      |                  | 511.322626         | 1                       | y4       | 16               |
|                |                       |                      |                  | 265.118283         | 1                       | a2       | 17               |

\*Amino acids in bold are labeled with heavy stable isotopes. Lysine (K) is 8 Da heavier and arginine (R) is 10 Da heavier.

**Supplemental Table S4.** Comparison of detection limits for 18 peptides spiked into a *Shewanella* lysate

| Peptide sequence     | LOD (amol)    |             |               | Linearity     |               |               |
|----------------------|---------------|-------------|---------------|---------------|---------------|---------------|
|                      | Orthogonal    | Inline      | S-lens        | Orthogonal    | Inline        | S-lens        |
| AFKDEDTQAMPFR        | <u>500*</u>   | 1000        | 2000          | 0.9981        | n/a           | n/a           |
| DFPIANGER            | 125           | 125         | <u>15.625</u> | 0.9977        | <u>0.9985</u> | 0.979         |
| DGPLTGTYSR           | <u>125</u>    | 250         | <u>125</u>    | <u>0.9921</u> | 0.991         | 0.9847        |
| EDLIAYLK             | <u>250</u>    | <u>250</u>  | 500           | 0.987         | 0.9905        | <u>0.9955</u> |
| GGLEPINFQTAADQAR     | <u>31.25</u>  | 62.5        | <u>31.25</u>  | <u>0.9967</u> | 0.9947        | 0.9967        |
| HGFLPR               | <u>125</u>    | <u>125</u>  | 500           | <u>0.9997</u> | 0.9938        | 0.9958        |
| IVGGWECEK            | <u>125</u>    | <u>125</u>  | 1000          | <u>0.9983</u> | 0.9979        | n/a           |
| LFTGHPETLEK          | <u>125</u>    | 250         | 250           | <u>0.9992</u> | 0.9942        | 0.996         |
| LSEPAELTDAVK         | <u>31.25</u>  | 62.5        | <u>31.25</u>  | 0.9959        | <u>0.9992</u> | 0.9939        |
| LWSAEIPNLYR          | <u>125</u>    | <u>125</u>  | 1000          | <u>0.9843</u> | 0.9919        | n/a           |
| TGPNLHGLFGR          | <u>125</u>    | 250         | 500           | 0.9858        | 0.9871        | <u>0.9987</u> |
| TQDENPVVHFFK         | <u>31.25</u>  | 62.5        | 62.5          | 0.9963        | 0.9936        | <u>0.9971</u> |
| VDEDQPFPAVPK         | <u>15.625</u> | 62.5        | 31.25         | <u>0.9996</u> | 0.9991        | 0.9978        |
| VEADIAGHGQEVLR       | 500           | 500         | 500           | 0.9641        | 0.9631        | <u>0.9746</u> |
| VLAIDLHNLNEDQLR      | 62.5          | 62.5        | 62.5          | 0.99          | 0.9928        | <u>0.9956</u> |
| VLVLDTDYKK           | 250           | <u>125</u>  | 250           | 0.9972        | 0.9978        | <u>0.9998</u> |
| VYVEELKPTPEGDLEILLQK | <u>1000</u>   | <u>1000</u> | 2000          | n/a           | n/a           | n/a           |
| YEINVLR              | 31.25         | 31.25       | 31.25         | <u>0.999</u>  | 0.9976        | 0.9955        |

\*The best LOD obtained by orthogonal, inline ion funnel or S-lens for each peptide is underlined.

\*The mass spectra of lowest detectable concentration for each peptide was manually inspected to ensure the S/N is greater than 3.
